# Supplementary material
Source: PubMed Central journal article supplement (PMC4082481)
Supplement: NIHMS574216-supplement-supplement_1.pdf [file NIHMS574216-supplement-supplement_1.pdf]

1  
2  
3  
4  
5  
6  
7  
8  
9  
10  
11  
12  
13  
14  
15  
16  
17  
18  
19  
20  
21  
22  
23  
24  
25  
26  
27  
28  
29  
30  
31  
32  
33  
34  
35  
36  
37  
38  
39  
40  
41  
42  
43  
44  
45  
46  
47  
48  
49  
50  
51  
52  
53  
54  
55  
56  
57  
58  
59  
60

**Supplemental data**

**“Sample size determination in group-sequential clinical trials with two co-primary endpoints”**

by Koko Asakura, Toshimitsu Hamasaki, Tomoyuki Sugimoto, Kenichi Hayashi, Scott R Evans and Takashi Sozu

**Table S1.** Impact of sample size recalculation on the power and Type I error rate. The planned MSS per intervention group is calculated to detect the joint effect for two endpoints with the overall power of 80% at the one-sided significance level of 2.5%, where one interim and one final analysis are to be performed. The critical values are determined by the OF boundary for both endpoints with the LD alpha-spending method. The upper limit of recalculation sample size is  $n'_2 = \lambda n_2$  with  $\lambda = 1.5$ . The number of replications for simulation is set to 1,000,000 for evaluation of the Type I error rate and 100,000 replications for the power. (DF-1)

| Information time | Power/ Type I error rate | Mean difference ( $\delta_s, \delta_c$ ) | Correlation (MSS) | (i) Only decreasing sample size (ASN) | (ii) Only increasing sample Size (ASN) | (iii) Increasing or decreasing sample size (ASN) |
|------------------|--------------------------|------------------------------------------|-------------------|---------------------------------------|----------------------------------------|--------------------------------------------------|
| 0.25             | Power                    | (0.2, 0.2)                               | 0.0 ( 516)        | 71.0 ( 448)                           | 88.9 ( 640)                            | 79.7 ( 571)                                      |
|                  |                          |                                          | 0.3 ( 504)        | 69.6 ( 425)                           | 88.5 ( 616)                            | 77.9 ( 537)                                      |
|                  |                          |                                          | 0.5 ( 492)        | 68.9 ( 406)                           | 88.1 ( 596)                            | 76.7 ( 509)                                      |
|                  |                          |                                          | 0.8 ( 460)        | 67.5 ( 365)                           | 87.4 ( 549)                            | 74.6 ( 455)                                      |
|                  | Type I error rate        | (0.0, 0.0)                               | 0.99 ( 412)       | 66.1 ( 313)                           | 86.9 ( 484)                            | 72.6 ( 384)                                      |
|                  |                          |                                          | 0.0 ( 516)        | 0.06 ( 515)                           | 0.06 ( 578)                            | 0.06 ( 577)                                      |
|                  |                          |                                          | 0.3 ( 504)        | 0.24 ( 502)                           | 0.24 ( 573)                            | 0.24 ( 571)                                      |
|                  |                          |                                          | 0.5 ( 492)        | 0.46 ( 489)                           | 0.46 ( 565)                            | 0.46 ( 562)                                      |
|                  |                          | (0.0, 0.2)                               | 0.8 ( 460)        | 1.10 ( 453)                           | 1.10 ( 537)                            | 1.10 ( 530)                                      |
|                  |                          |                                          | 0.99 ( 412)       | 2.17 ( 401)                           | 2.17 ( 490)                            | 2.18 ( 478)                                      |
|                  |                          |                                          | 0.0 ( 516)        | 2.17 ( 509)                           | 2.37 ( 620)                            | 2.29 ( 613)                                      |
|                  |                          |                                          | 0.3 ( 504)        | 2.39 ( 493)                           | 2.47 ( 603)                            | 2.41 ( 593)                                      |
|                  | Type I error rate        | (0.0, 0.0)                               | 0.5 ( 492)        | 2.46 ( 479)                           | 2.50 ( 588)                            | 2.46 ( 576)                                      |
|                  |                          |                                          | 0.8 ( 460)        | 2.50 ( 446)                           | 2.50 ( 549)                            | 2.50 ( 535)                                      |
|                  |                          |                                          | 0.99 ( 412)       | 2.50 ( 399)                           | 2.50 ( 491)                            | 2.49 ( 479)                                      |
|                  |                          |                                          | 0.0 ( 518)        | 0.06 ( 518)                           | 0.06 ( 582)                            | 0.06 ( 582)                                      |
| (0.0, 0.2)       |                          | 0.3 ( 506)                               | 0.23 ( 506)       | 0.23 ( 580)                           | 0.23 ( 580)                            |                                                  |
|                  |                          | 0.5 ( 492)                               | 0.46 ( 491)       | 0.46 ( 571)                           | 0.45 ( 571)                            |                                                  |
|                  |                          | 0.8 ( 460)                               | 1.08 ( 459)       | 1.08 ( 546)                           | 1.09 ( 545)                            |                                                  |
|                  |                          | 0.99 ( 410)                              | 2.17 ( 407)       | 2.16 ( 499)                           | 2.17 ( 496)                            |                                                  |
| 0.50             | Power                    | (0.2, 0.2)                               | 0.0 ( 518)        | 74.0 ( 448)                           | 91.3 ( 618)                            | 85.2 ( 564)                                      |
|                  |                          |                                          | 0.3 ( 506)        | 74.0 ( 429)                           | 90.9 ( 591)                            | 84.7 ( 536)                                      |
|                  |                          |                                          | 0.5 ( 492)        | 73.8 ( 411)                           | 90.4 ( 566)                            | 84.2 ( 511)                                      |
|                  |                          |                                          | 0.8 ( 460)        | 73.6 ( 376)                           | 89.6 ( 517)                            | 83.2 ( 463)                                      |
|                  | Type I error rate        | (0.0, 0.0)                               | 0.99 ( 410)       | 73.3 ( 327)                           | 88.8 ( 449)                            | 82.0 ( 399)                                      |
|                  |                          |                                          | 0.0 ( 518)        | 0.06 ( 518)                           | 0.06 ( 582)                            | 0.06 ( 582)                                      |
|                  |                          |                                          | 0.3 ( 506)        | 0.23 ( 506)                           | 0.23 ( 580)                            | 0.23 ( 580)                                      |
|                  |                          |                                          | 0.5 ( 492)        | 0.46 ( 491)                           | 0.46 ( 571)                            | 0.45 ( 571)                                      |
|                  |                          | (0.0, 0.2)                               | 0.8 ( 460)        | 1.08 ( 459)                           | 1.08 ( 546)                            | 1.09 ( 545)                                      |
|                  |                          |                                          | 0.99 ( 410)       | 2.17 ( 407)                           | 2.16 ( 499)                            | 2.17 ( 496)                                      |
|                  |                          |                                          | 0.0 ( 518)        | 2.17 ( 516)                           | 2.37 ( 637)                            | 2.33 ( 635)                                      |
|                  |                          |                                          | 0.3 ( 506)        | 2.41 ( 503)                           | 2.46 ( 620)                            | 2.46 ( 617)                                      |
|                  | Type I error rate        | (0.0, 0.0)                               | 0.5 ( 492)        | 2.48 ( 488)                           | 2.50 ( 602)                            | 2.48 ( 599)                                      |
|                  |                          |                                          | 0.8 ( 460)        | 2.49 ( 456)                           | 2.49 ( 563)                            | 2.49 ( 559)                                      |
|                  |                          |                                          | 0.99 ( 410)       | 2.50 ( 407)                           | 2.51 ( 502)                            | 2.51 ( 498)                                      |
|                  |                          |                                          | 0.0 ( 518)        | 2.17 ( 516)                           | 2.37 ( 637)                            | 2.33 ( 635)                                      |
| (0.0, 0.2)       |                          | 0.3 ( 506)                               | 2.41 ( 503)       | 2.46 ( 620)                           | 2.46 ( 617)                            |                                                  |
|                  |                          | 0.5 ( 492)                               | 2.48 ( 488)       | 2.50 ( 602)                           | 2.48 ( 599)                            |                                                  |
|                  |                          | 0.8 ( 460)                               | 2.49 ( 456)       | 2.49 ( 563)                           | 2.49 ( 559)                            |                                                  |
|                  |                          | 0.99 ( 410)                              | 2.50 ( 407)       | 2.51 ( 502)                           | 2.51 ( 498)                            |                                                  |
| 0.75             | Power                    | (0.2, 0.2)                               | 0.0 ( 528)        | 79.7 ( 462)                           | 91.9 ( 557)                            | 91.3 ( 552)                                      |
|                  |                          |                                          | 0.3 ( 516)        | 79.8 ( 449)                           | 91.6 ( 538)                            | 91.0 ( 534)                                      |
|                  |                          |                                          | 0.5 ( 500)        | 79.5 ( 434)                           | 91.1 ( 518)                            | 90.5 ( 515)                                      |
|                  |                          |                                          | 0.8 ( 468)        | 79.5 ( 403)                           | 90.3 ( 480)                            | 89.9 ( 476)                                      |
|                  | Type I error rate        | (0.0, 0.0)                               | 0.99 ( 416)       | 79.6 ( 356)                           | 89.4 ( 422)                            | 89.0 ( 418)                                      |
|                  |                          |                                          | 0.0 ( 528)        | 0.05 ( 528)                           | 0.05 ( 594)                            | 0.05 ( 594)                                      |
|                  |                          |                                          | 0.3 ( 516)        | 0.22 ( 516)                           | 0.21 ( 592)                            | 0.22 ( 592)                                      |
|                  |                          |                                          | 0.5 ( 500)        | 0.45 ( 500)                           | 0.44 ( 582)                            | 0.43 ( 582)                                      |
|                  |                          | (0.0, 0.2)                               | 0.8 ( 468)        | 1.07 ( 467)                           | 1.07 ( 558)                            | 1.08 ( 558)                                      |
|                  |                          |                                          | 0.99 ( 416)       | 2.17 ( 415)                           | 2.17 ( 509)                            | 2.18 ( 509)                                      |
|                  |                          |                                          | 0.0 ( 528)        | 2.17 ( 527)                           | 2.33 ( 653)                            | 2.32 ( 653)                                      |
|                  |                          |                                          | 0.3 ( 516)        | 2.41 ( 515)                           | 2.46 ( 637)                            | 2.46 ( 637)                                      |
|                  | Type I error rate        | (0.0, 0.0)                               | 0.5 ( 500)        | 2.47 ( 499)                           | 2.51 ( 617)                            | 2.49 ( 617)                                      |
|                  |                          |                                          | 0.8 ( 468)        | 2.50 ( 467)                           | 2.52 ( 577)                            | 2.49 ( 577)                                      |
|                  |                          |                                          | 0.99 ( 416)       | 2.49 ( 415)                           | 2.49 ( 513)                            | 2.50 ( 513)                                      |
|                  |                          |                                          | 0.0 ( 528)        | 2.17 ( 527)                           | 2.33 ( 653)                            | 2.32 ( 653)                                      |
| (0.0, 0.2)       |                          | 0.3 ( 516)                               | 2.41 ( 515)       | 2.46 ( 637)                           | 2.46 ( 637)                            |                                                  |
|                  |                          | 0.5 ( 500)                               | 2.47 ( 499)       | 2.51 ( 617)                           | 2.49 ( 617)                            |                                                  |
|                  |                          | 0.8 ( 468)                               | 2.50 ( 467)       | 2.52 ( 577)                           | 2.49 ( 577)                            |                                                  |
|                  |                          | 0.99 ( 416)                              | 2.49 ( 415)       | 2.49 ( 513)                           | 2.50 ( 513)                            |                                                  |

**Table S2.** Impact of sample size recalculation on the power and Type I error rate. The planned MSS per intervention group is calculated to detect the joint effect for two endpoints with the overall power of 80% at the one-sided significance level of 2.5%, where one interim and one final analysis are to be performed and the critical values are determined by the OF boundary for both endpoints with the LD alpha-spending method. The upper limit of recalculation sample size is  $n'_2 = \lambda n_2$  with  $\lambda = 1.5$ . The number of replications for simulation is set to 1,000,000 for evaluation of the Type I error rate and 100,000 replications for the power. (DF-2)

| Information time  | Power/ Type I error rate | Mean difference ( $\delta_1, \delta_2$ ) | Correlation (MSS) | (i) Only decreasing sample size (ASN) | (ii) Only increasing sample Size (ASN) | (iii) Increasing or decreasing sample size (ASN) |             |             |
|-------------------|--------------------------|------------------------------------------|-------------------|---------------------------------------|----------------------------------------|--------------------------------------------------|-------------|-------------|
| 0.25              | Power                    | (0.2, 0.2)                               | 0.0 ( 516)        | 71.0 ( 449)                           | 88.9 ( 640)                            | 79.8 ( 573)                                      |             |             |
|                   |                          |                                          | 0.3 ( 504)        | 69.7 ( 426)                           | 88.4 ( 616)                            | 77.9 ( 537)                                      |             |             |
|                   |                          |                                          | 0.5 ( 492)        | 68.8 ( 406)                           | 88.1 ( 596)                            | 76.8 ( 512)                                      |             |             |
|                   |                          |                                          | 0.8 ( 460)        | 67.4 ( 366)                           | 87.4 ( 549)                            | 74.6 ( 455)                                      |             |             |
|                   |                          |                                          | 0.99 ( 412)       | 66.1 ( 312)                           | 86.9 ( 484)                            | 72.6 ( 385)                                      |             |             |
|                   |                          |                                          | Type I error rate | (0.0, 0.0)                            | 0.0 ( 516)                             | 0.06 ( 515)                                      | 0.06 ( 578) | 0.06 ( 577) |
|                   |                          |                                          |                   |                                       | 0.3 ( 504)                             | 0.24 ( 502)                                      | 0.24 ( 573) | 0.24 ( 571) |
|                   |                          |                                          |                   |                                       | 0.5 ( 492)                             | 0.46 ( 489)                                      | 0.46 ( 565) | 0.46 ( 561) |
|                   |                          |                                          |                   |                                       | 0.8 ( 460)                             | 1.09 ( 453)                                      | 1.10 ( 537) | 1.10 ( 530) |
|                   | 0.99 ( 412)              | 2.17 ( 401)                              |                   |                                       | 2.17 ( 489)                            | 2.17 ( 478)                                      |             |             |
|                   | (0.0, 0.2)               | 0.0 ( 516)                               |                   |                                       | 2.17 ( 509)                            | 2.36 ( 620)                                      | 2.29 ( 613) |             |
|                   |                          | 0.3 ( 504)                               |                   |                                       | 2.39 ( 493)                            | 2.47 ( 604)                                      | 2.42 ( 593) |             |
|                   |                          | 0.5 ( 492)                               |                   |                                       | 2.46 ( 479)                            | 2.50 ( 588)                                      | 2.46 ( 575) |             |
|                   |                          | 0.8 ( 460)                               |                   |                                       | 2.50 ( 446)                            | 2.50 ( 549)                                      | 2.50 ( 535) |             |
|                   |                          | 0.99 ( 412)                              | 2.50 ( 399)       | 2.50 ( 492)                           | 2.50 ( 479)                            |                                                  |             |             |
|                   |                          | 0.50                                     | Power             | (0.2, 0.2)                            | 0.0 ( 518)                             | 74.4 ( 448)                                      | 91.3 ( 618) | 85.7 ( 563) |
|                   |                          |                                          |                   |                                       | 0.3 ( 506)                             | 74.3 ( 428)                                      | 91.0 ( 591) | 85.1 ( 536) |
|                   |                          |                                          |                   |                                       | 0.5 ( 492)                             | 74.0 ( 411)                                      | 90.5 ( 566) | 84.4 ( 512) |
| 0.8 ( 460)        |                          |                                          |                   |                                       | 73.6 ( 376)                            | 89.7 ( 516)                                      | 83.4 ( 462) |             |
| 0.99 ( 410)       | 73.4 ( 327)              |                                          |                   |                                       | 88.8 ( 449)                            | 82.1 ( 398)                                      |             |             |
| Type I error rate | (0.0, 0.0)               |                                          |                   |                                       | 0.0 ( 518)                             | 0.06 ( 518)                                      | 0.06 ( 582) | 0.06 ( 582) |
|                   |                          |                                          |                   |                                       | 0.3 ( 506)                             | 0.24 ( 506)                                      | 0.24 ( 580) | 0.24 ( 580) |
|                   |                          |                                          |                   |                                       | 0.5 ( 492)                             | 0.46 ( 491)                                      | 0.46 ( 571) | 0.46 ( 570) |
|                   |                          |                                          |                   |                                       | 0.8 ( 460)                             | 1.09 ( 459)                                      | 1.09 ( 546) | 1.09 ( 544) |
|                   |                          |                                          | 0.99 ( 410)       | 2.17 ( 407)                           | 2.18 ( 498)                            | 2.18 ( 496)                                      |             |             |
|                   |                          |                                          | (0.0, 0.2)        | 0.0 ( 518)                            | 2.21 ( 516)                            | 2.40 ( 637)                                      | 2.37 ( 635) |             |
|                   |                          |                                          |                   | 0.3 ( 506)                            | 2.43 ( 503)                            | 2.47 ( 620)                                      | 2.46 ( 617) |             |
|                   |                          |                                          |                   | 0.5 ( 492)                            | 2.49 ( 488)                            | 2.50 ( 603)                                      | 2.48 ( 599) |             |
|                   |                          |                                          |                   | 0.8 ( 460)                            | 2.50 ( 456)                            | 2.50 ( 563)                                      | 2.49 ( 559) |             |
| 0.99 ( 410)       | 2.50 ( 407)              |                                          |                   | 2.50 ( 502)                           | 2.50 ( 499)                            |                                                  |             |             |
| 0.75              | Power                    |                                          |                   | (0.2, 0.2)                            | 0.0 ( 528)                             | 79.9 ( 461)                                      | 91.9 ( 556) | 91.4 ( 551) |
|                   |                          |                                          |                   |                                       | 0.3 ( 512)                             | 79.3 ( 446)                                      | 91.5 ( 534) | 90.9 ( 530) |
|                   |                          |                                          |                   |                                       | 0.5 ( 500)                             | 79.6 ( 433)                                      | 91.2 ( 518) | 90.6 ( 514) |
|                   |                          | 0.8 ( 468)                               |                   |                                       | 79.5 ( 403)                            | 90.4 ( 480)                                      | 89.9 ( 476) |             |
|                   |                          | 0.99 ( 416)                              | 79.5 ( 356)       |                                       | 89.4 ( 422)                            | 89.0 ( 418)                                      |             |             |
|                   |                          | Type I error rate                        | (0.0, 0.0)        |                                       | 0.0 ( 528)                             | 0.06 ( 528)                                      | 0.06 ( 594) | 0.06 ( 594) |
|                   |                          |                                          |                   |                                       | 0.3 ( 512)                             | 0.23 ( 512)                                      | 0.23 ( 588) | 0.24 ( 588) |
|                   |                          |                                          |                   |                                       | 0.5 ( 500)                             | 0.46 ( 500)                                      | 0.45 ( 582) | 0.46 ( 582) |
|                   |                          |                                          |                   |                                       | 0.8 ( 468)                             | 1.08 ( 467)                                      | 1.08 ( 558) | 1.09 ( 558) |
|                   | 0.99 ( 416)              |                                          |                   | 2.16 ( 415)                           | 2.16 ( 510)                            | 2.15 ( 509)                                      |             |             |
|                   | (0.0, 0.2)               |                                          |                   | 0.0 ( 528)                            | 2.24 ( 527)                            | 2.38 ( 653)                                      | 2.40 ( 653) |             |
|                   |                          |                                          |                   | 0.3 ( 512)                            | 2.44 ( 511)                            | 2.48 ( 632)                                      | 2.47 ( 632) |             |
|                   |                          |                                          |                   | 0.5 ( 500)                            | 2.48 ( 499)                            | 2.50 ( 617)                                      | 2.50 ( 617) |             |
|                   |                          |                                          |                   | 0.8 ( 468)                            | 2.49 ( 467)                            | 2.51 ( 578)                                      | 2.50 ( 577) |             |
|                   |                          | 0.99 ( 416)                              | 2.51 ( 415)       | 2.52 ( 513)                           | 2.51 ( 513)                            |                                                  |             |             |

**Table S3.** Impact of sample size recalculation on the power and Type I error rate. The planned MSS per intervention group is calculated to detect the joint effect for two endpoints with the overall power of 80% at the one-sided significance level of 2.5%, where three interims and one final analysis are to be performed at equal time intervals and the critical values are determined by the OF boundary for both endpoints with the LD alpha-spending method. The upper limit of recalculation sample size is  $n'_2 = \lambda n_2$  with  $\lambda = 1.5$ . The number of replications for simulation is set to 1,000,000 for evaluation of the Type I error rate and 100,000 replications for the power. (DF-1)

| Interim analysis     | Power/<br>Type I<br>error rate | Mean<br>difference<br>( $\delta_1, \delta_2$ ) | Correlation<br>(MSS) | (i) Only<br>decreasing<br>sample size<br>(ASN) | (ii) Only<br>increasing<br>sample Size<br>(ASN) | (iii) Increasing<br>or decreasing<br>sample size<br>(ASN) |             |
|----------------------|--------------------------------|------------------------------------------------|----------------------|------------------------------------------------|-------------------------------------------------|-----------------------------------------------------------|-------------|
| 1st                  | Power                          | (0.2, 0.2)                                     | 0.0 ( 528)           | 71.3 ( 459)                                    | 89.1 ( 655)                                     | 80.4 ( 586)                                               |             |
|                      |                                |                                                | 0.3 ( 516)           | 70.2 ( 435)                                    | 88.6 ( 631)                                     | 78.6 ( 551)                                               |             |
|                      |                                |                                                | 0.5 ( 504)           | 69.5 ( 416)                                    | 88.3 ( 611)                                     | 77.4 ( 523)                                               |             |
|                      |                                |                                                | 0.8 ( 468)           | 67.9 ( 373)                                    | 87.4 ( 558)                                     | 75.4 ( 464)                                               |             |
|                      |                                |                                                | 0.99 ( 420)          | 67.0 ( 319)                                    | 87.0 ( 494)                                     | 73.7 ( 394)                                               |             |
|                      | Type I<br>error rate           | (0.0, 0.0)                                     | 0.0 ( 528)           | 0.05 ( 527)                                    | 0.05 ( 591)                                     | 0.05 ( 591)                                               |             |
|                      |                                |                                                | 0.3 ( 516)           | 0.21 ( 514)                                    | 0.22 ( 587)                                     | 0.22 ( 585)                                               |             |
|                      |                                |                                                | 0.5 ( 504)           | 0.44 ( 501)                                    | 0.44 ( 579)                                     | 0.44 ( 576)                                               |             |
|                      |                                |                                                | 0.8 ( 468)           | 1.07 ( 461)                                    | 1.07 ( 547)                                     | 1.07 ( 540)                                               |             |
|                      |                                |                                                | 0.99 ( 420)          | 2.17 ( 409)                                    | 2.17 ( 499)                                     | 2.17 ( 488)                                               |             |
|                      |                                | (0.0, 0.2)                                     | 0.0 ( 528)           | 2.07 ( 521)                                    | 2.30 ( 635)                                     | 2.21 ( 628)                                               |             |
|                      |                                |                                                | 0.3 ( 516)           | 2.35 ( 506)                                    | 2.45 ( 619)                                     | 2.38 ( 608)                                               |             |
|                      |                                |                                                | 0.5 ( 504)           | 2.44 ( 491)                                    | 2.48 ( 603)                                     | 2.45 ( 591)                                               |             |
|                      |                                |                                                | 0.8 ( 468)           | 2.50 ( 454)                                    | 2.50 ( 559)                                     | 2.50 ( 545)                                               |             |
|                      | 0.99 ( 420)                    | 2.51 ( 407)                                    | 2.51 ( 502)          | 2.51 ( 489)                                    |                                                 |                                                           |             |
|                      | 2nd                            | Power                                          | (0.2, 0.2)           | 0.0 ( 528)                                     | 74.4 ( 454)                                     | 91.4 ( 628)                                               | 85.5 ( 571) |
|                      |                                |                                                |                      | 0.3 ( 516)                                     | 74.3 ( 435)                                     | 91.1 ( 600)                                               | 85.1 ( 543) |
|                      |                                |                                                |                      | 0.5 ( 504)                                     | 74.4 ( 418)                                     | 90.9 ( 578)                                               | 84.8 ( 520) |
| 0.8 ( 468)           |                                |                                                |                      | 73.8 ( 380)                                    | 89.8 ( 524)                                     | 83.6 ( 468)                                               |             |
| 0.99 ( 420)          |                                |                                                |                      | 74.0 ( 332)                                    | 89.2 ( 458)                                     | 82.6 ( 405)                                               |             |
| Type I<br>error rate |                                | (0.0, 0.0)                                     | 0.0 ( 528)           | 0.05 ( 528)                                    | 0.05 ( 594)                                     | 0.05 ( 593)                                               |             |
|                      |                                |                                                | 0.3 ( 516)           | 0.21 ( 516)                                    | 0.22 ( 592)                                     | 0.22 ( 591)                                               |             |
|                      |                                |                                                | 0.5 ( 504)           | 0.43 ( 503)                                    | 0.43 ( 585)                                     | 0.44 ( 585)                                               |             |
|                      |                                |                                                | 0.8 ( 468)           | 1.07 ( 467)                                    | 1.08 ( 555)                                     | 1.08 ( 554)                                               |             |
|                      |                                |                                                | 0.99 ( 420)          | 2.17 ( 417)                                    | 2.15 ( 511)                                     | 2.15 ( 508)                                               |             |
|                      |                                | (0.0, 0.2)                                     | 0.0 ( 528)           | 2.12 ( 526)                                    | 2.32 ( 649)                                     | 2.28 ( 647)                                               |             |
|                      |                                |                                                | 0.3 ( 516)           | 2.39 ( 513)                                    | 2.44 ( 633)                                     | 2.43 ( 630)                                               |             |
|                      |                                |                                                | 0.5 ( 504)           | 2.47 ( 500)                                    | 2.48 ( 618)                                     | 2.48 ( 614)                                               |             |
|                      |                                |                                                | 0.8 ( 468)           | 2.51 ( 464)                                    | 2.50 ( 573)                                     | 2.50 ( 570)                                               |             |
| 0.99 ( 420)          |                                | 2.49 ( 416)                                    | 2.51 ( 514)          | 2.51 ( 511)                                    |                                                 |                                                           |             |
| 3rd                  |                                | Power                                          | (0.2, 0.2)           | 0.0 ( 528)                                     | 79.4 ( 455)                                     | 91.8 ( 549)                                               | 91.1 ( 545) |
|                      |                                |                                                |                      | 0.3 ( 516)                                     | 79.6 ( 437)                                     | 91.6 ( 525)                                               | 91.0 ( 522) |
|                      |                                |                                                |                      | 0.5 ( 504)                                     | 79.9 ( 422)                                     | 91.3 ( 508)                                               | 90.7 ( 503) |
|                      | 0.8 ( 468)                     |                                                |                      | 79.5 ( 387)                                    | 90.4 ( 464)                                     | 89.8 ( 459)                                               |             |
|                      | 0.99 ( 420)                    |                                                |                      | 79.8 ( 342)                                    | 89.7 ( 407)                                     | 89.2 ( 403)                                               |             |
|                      | Type I<br>error rate           | (0.0, 0.0)                                     | 0.0 ( 528)           | 0.05 ( 528)                                    | 0.05 ( 594)                                     | 0.05 ( 594)                                               |             |
|                      |                                |                                                | 0.3 ( 516)           | 0.22 ( 516)                                    | 0.22 ( 592)                                     | 0.22 ( 592)                                               |             |
|                      |                                |                                                | 0.5 ( 504)           | 0.43 ( 504)                                    | 0.43 ( 587)                                     | 0.43 ( 587)                                               |             |
|                      |                                |                                                | 0.8 ( 468)           | 1.09 ( 467)                                    | 1.08 ( 558)                                     | 1.08 ( 558)                                               |             |
|                      |                                |                                                | 0.99 ( 420)          | 2.17 ( 419)                                    | 2.15 ( 515)                                     | 2.16 ( 514)                                               |             |
|                      |                                | (0.0, 0.2)                                     | 0.0 ( 528)           | 2.14 ( 527)                                    | 2.30 ( 653)                                     | 2.30 ( 653)                                               |             |
|                      |                                |                                                | 0.3 ( 516)           | 2.41 ( 514)                                    | 2.45 ( 637)                                     | 2.47 ( 636)                                               |             |
|                      |                                |                                                | 0.5 ( 504)           | 2.48 ( 502)                                    | 2.49 ( 622)                                     | 2.49 ( 621)                                               |             |
|                      |                                |                                                | 0.8 ( 468)           | 2.50 ( 466)                                    | 2.50 ( 577)                                     | 2.52 ( 577)                                               |             |
|                      | 0.99 ( 420)                    | 2.49 ( 419)                                    | 2.48 ( 518)          | 2.50 ( 518)                                    |                                                 |                                                           |             |

**Table S4.** Impact of sample size recalculation on the power and Type I error rate. The planned MSS per intervention group is calculated to detect the joint effect for two endpoints with the overall power of 80% at the one-sided significance level of 2.5%, where three interims and one final analysis are to be performed at equal time intervals and the critical values are determined by the OF boundary for both endpoints with the LD alpha-spending method. The upper limit of recalculation sample size is  $n'_2 = \lambda n_2$  with  $\lambda = 1.5$ . The number of replications for simulation is set to 1,000,000 for evaluation of the Type I error rate and 100,000 replications for the power. (DF-2)

| Interim analysis     | Power/<br>Type I<br>error rate | Mean<br>difference<br>( $\delta_1, \delta_2$ ) | Correlation<br>(MSS) | (i) Only<br>decreasing<br>sample size<br>(ASN) | (ii) Only<br>increasing<br>sample Size<br>(ASN) | (iii) Increasing<br>or decreasing<br>sample size<br>(ASN) |             |
|----------------------|--------------------------------|------------------------------------------------|----------------------|------------------------------------------------|-------------------------------------------------|-----------------------------------------------------------|-------------|
| 1st                  | Power                          | (0.2, 0.2)                                     | 0.0 ( 528)           | 71.8 ( 459)                                    | 89.2 ( 655)                                     | 80.6 ( 585)                                               |             |
|                      |                                |                                                | 0.3 ( 516)           | 70.2 ( 433)                                    | 88.4 ( 626)                                     | 78.7 ( 547)                                               |             |
|                      |                                |                                                | 0.5 ( 504)           | 69.4 ( 413)                                    | 88.2 ( 606)                                     | 77.4 ( 519)                                               |             |
|                      |                                |                                                | 0.8 ( 468)           | 68.0 ( 372)                                    | 87.5 ( 559)                                     | 75.4 ( 463)                                               |             |
|                      |                                |                                                | 0.99 ( 420)          | 67.0 ( 319)                                    | 87.0 ( 494)                                     | 73.6 ( 394)                                               |             |
|                      | Type I<br>error rate           | (0.0, 0.0)                                     | 0.0 ( 528)           | 0.06 ( 527)                                    | 0.06 ( 591)                                     | 0.06 ( 591)                                               |             |
|                      |                                |                                                | 0.3 ( 516)           | 0.23 ( 510)                                    | 0.23 ( 582)                                     | 0.23 ( 580)                                               |             |
|                      |                                |                                                | 0.5 ( 504)           | 0.45 ( 497)                                    | 0.45 ( 574)                                     | 0.45 ( 571)                                               |             |
|                      |                                |                                                | 0.8 ( 468)           | 1.09 ( 461)                                    | 1.09 ( 546)                                     | 1.08 ( 540)                                               |             |
|                      |                                |                                                | 0.99 ( 420)          | 2.17 ( 409)                                    | 2.17 ( 499)                                     | 2.17 ( 489)                                               |             |
|                      |                                | (0.0, 0.2)                                     | 0.0 ( 528)           | 2.17 ( 521)                                    | 2.36 ( 635)                                     | 2.29 ( 628)                                               |             |
|                      |                                |                                                | 0.3 ( 516)           | 2.39 ( 502)                                    | 2.47 ( 613)                                     | 2.41 ( 603)                                               |             |
|                      |                                |                                                | 0.5 ( 504)           | 2.45 ( 488)                                    | 2.49 ( 598)                                     | 2.46 ( 585)                                               |             |
|                      |                                |                                                | 0.8 ( 468)           | 2.50 ( 454)                                    | 2.50 ( 559)                                     | 2.49 ( 545)                                               |             |
|                      | 0.99 ( 420)                    | 2.50 ( 407)                                    | 2.50 ( 502)          | 2.50 ( 489)                                    |                                                 |                                                           |             |
|                      | 2nd                            | Power                                          | (0.2, 0.2)           | 0.0 ( 528)                                     | 74.8 ( 453)                                     | 91.5 ( 629)                                               | 86.0 ( 571) |
|                      |                                |                                                |                      | 0.3 ( 516)                                     | 74.3 ( 431)                                     | 90.9 ( 597)                                               | 85.1 ( 540) |
|                      |                                |                                                |                      | 0.5 ( 504)                                     | 74.4 ( 414)                                     | 90.7 ( 574)                                               | 84.8 ( 516) |
| 0.8 ( 468)           |                                |                                                |                      | 74.0 ( 380)                                    | 89.9 ( 524)                                     | 83.7 ( 467)                                               |             |
| 0.99 ( 420)          |                                |                                                |                      | 73.9 ( 332)                                    | 89.1 ( 458)                                     | 82.7 ( 405)                                               |             |
| Type I<br>error rate |                                | (0.0, 0.0)                                     | 0.0 ( 528)           | 0.06 ( 528)                                    | 0.06 ( 594)                                     | 0.06 ( 593)                                               |             |
|                      |                                |                                                | 0.3 ( 516)           | 0.23 ( 512)                                    | 0.23 ( 587)                                     | 0.23 ( 587)                                               |             |
|                      |                                |                                                | 0.5 ( 504)           | 0.45 ( 499)                                    | 0.45 ( 581)                                     | 0.45 ( 580)                                               |             |
|                      |                                |                                                | 0.8 ( 468)           | 1.08 ( 466)                                    | 1.08 ( 555)                                     | 1.08 ( 554)                                               |             |
|                      |                                |                                                | 0.99 ( 420)          | 2.17 ( 417)                                    | 2.16 ( 511)                                     | 2.17 ( 508)                                               |             |
|                      |                                | (0.0, 0.2)                                     | 0.0 ( 528)           | 2.21 ( 526)                                    | 2.38 ( 649)                                     | 2.37 ( 647)                                               |             |
|                      |                                |                                                | 0.3 ( 516)           | 2.42 ( 509)                                    | 2.48 ( 628)                                     | 2.46 ( 625)                                               |             |
|                      |                                |                                                | 0.5 ( 504)           | 2.47 ( 496)                                    | 2.50 ( 613)                                     | 2.48 ( 609)                                               |             |
|                      |                                |                                                | 0.8 ( 468)           | 2.51 ( 464)                                    | 2.51 ( 573)                                     | 2.49 ( 570)                                               |             |
| 0.99 ( 420)          |                                | 2.49 ( 416)                                    | 2.50 ( 514)          | 2.50 ( 511)                                    |                                                 |                                                           |             |
| 3rd                  |                                | Power                                          | (0.2, 0.2)           | 0.0 ( 528)                                     | 79.7 ( 453)                                     | 91.9 ( 549)                                               | 91.1 ( 544) |
|                      |                                |                                                |                      | 0.3 ( 512)                                     | 79.2 ( 434)                                     | 91.3 ( 525)                                               | 90.7 ( 518) |
|                      |                                |                                                |                      | 0.5 ( 500)                                     | 79.5 ( 419)                                     | 91.1 ( 506)                                               | 90.5 ( 500) |
|                      | 0.8 ( 468)                     |                                                |                      | 79.6 ( 387)                                    | 90.4 ( 463)                                     | 89.7 ( 460)                                               |             |
|                      | 0.99 ( 420)                    |                                                |                      | 79.9 ( 342)                                    | 89.7 ( 407)                                     | 89.1 ( 403)                                               |             |
|                      | Type I<br>error rate           | (0.0, 0.0)                                     | 0.0 ( 528)           | 0.06 ( 528)                                    | 0.06 ( 594)                                     | 0.06 ( 594)                                               |             |
|                      |                                |                                                | 0.3 ( 512)           | 0.23 ( 512)                                    | 0.23 ( 588)                                     | 0.23 ( 588)                                               |             |
|                      |                                |                                                | 0.5 ( 500)           | 0.45 ( 500)                                    | 0.46 ( 582)                                     | 0.45 ( 582)                                               |             |
|                      |                                |                                                | 0.8 ( 468)           | 1.09 ( 467)                                    | 1.08 ( 558)                                     | 1.08 ( 558)                                               |             |
|                      |                                |                                                | 0.99 ( 420)          | 2.16 ( 419)                                    | 2.18 ( 514)                                     | 2.16 ( 514)                                               |             |
|                      |                                | (0.0, 0.2)                                     | 0.0 ( 528)           | 2.23 ( 527)                                    | 2.39 ( 653)                                     | 2.41 ( 653)                                               |             |
|                      |                                |                                                | 0.3 ( 512)           | 2.44 ( 510)                                    | 2.48 ( 632)                                     | 2.47 ( 632)                                               |             |
|                      |                                |                                                | 0.5 ( 500)           | 2.48 ( 498)                                    | 2.49 ( 617)                                     | 2.49 ( 616)                                               |             |
|                      |                                |                                                | 0.8 ( 468)           | 2.51 ( 466)                                    | 2.50 ( 577)                                     | 2.51 ( 577)                                               |             |
|                      | 0.99 ( 420)                    | 2.51 ( 419)                                    | 2.50 ( 518)          | 2.49 ( 518)                                    |                                                 |                                                           |             |
